# Supplementary material for: Genomic loci influence patterns of structural covariance in the human brain
Source: PubMed Central journal article supplement — Proc Natl Acad Sci U S A. 2023 Dec 21;120(52):e2300842120. doi: 10.1073/pnas.2300842120 (PMC10756284; doi:10.1073/pnas.2300842120), 2023-12-21
Supplement: pnas.2300842120.sapp.pdf [file pnas.2300842120.sapp.pdf]

# 1 **Novel genomic loci influence patterns of structural covariance in the human** 2 **brain**

## 3 **Supporting Information**

4  
5 Junhao Wen<sup>1,2\*</sup>, Ilya M. Nasrallah<sup>2,3</sup>, Ahmed Abdulkadir<sup>2</sup>, Theodore D. Satterthwaite<sup>2,4</sup>, Zhijian Yang<sup>2</sup>,  
6 Guray Erus<sup>2</sup>, Timothy Robert-Fitzgerald<sup>5</sup>, Ashish Singh<sup>2</sup>, Aristeidis Sotiras<sup>6</sup>, Aleix Boquet-Pujadas<sup>7</sup>,  
7 Elizabeth Mamourian<sup>2</sup>, Jimit Doshi<sup>2</sup>, Yuhan Cui<sup>2</sup>, Dhivya Srinivasan<sup>2</sup>, Ioanna Skampardonis<sup>2</sup>, Jiong  
8 Chen<sup>2</sup>, Gyujoon Hwang<sup>2</sup>, Mark Bergman<sup>2</sup>, Jingxuan Bao<sup>8</sup>, Yogasudha Veturi<sup>9</sup>, Zhen Zhou<sup>2</sup>, Shu Yang<sup>8</sup>,  
9 Paola Dazzan<sup>10</sup>, Rene S. Kahn<sup>11</sup>, Hugo G. Schnack<sup>12</sup>, Marcus V. Zanetti<sup>13</sup>, Eva Meisenzahl<sup>14</sup>, Geraldo F.  
10 Busatto<sup>13</sup>, Benedicto Crespo-Facorro<sup>15</sup>, Christos Pantelis<sup>16</sup>, Stephen J. Wood<sup>17</sup>, Chuanjun Zhuo<sup>18</sup>, Russell  
11 T. Shinohara<sup>2,5</sup>, Ruben C. Gur<sup>4</sup>, Raquel E. Gur<sup>4</sup>, Nikolaos Koutsouleris<sup>19</sup>, Daniel H. Wolf<sup>2,4</sup>, Andrew J.  
12 Saykin<sup>20</sup>, Marylyn D. Ritchie<sup>9</sup>, Li Shen<sup>8</sup>, Paul M. Thompson<sup>21</sup>, Olivier Colliot<sup>22</sup>, Katharina Wittfeld<sup>23</sup>,  
13 Hans J. Grabe<sup>23</sup>, Duygu Tosun<sup>24</sup>, Murat Bilgel<sup>25</sup>, Yang An<sup>25</sup>, Daniel S. Marcus<sup>26</sup>, Pamela LaMontagne<sup>26</sup>,  
14 Susan R. Heckbert<sup>27</sup>, Thomas R. Austin<sup>27</sup>, Lenore J. Launer<sup>28</sup>, Mark Espeland<sup>29</sup>, Colin L Masters<sup>30</sup>, Paul  
15 Maruff<sup>30</sup>, Jurgen Fripp<sup>31</sup>, Sterling C. Johnson<sup>32</sup>, John C. Morris<sup>33</sup>, Marilyn S. Albert<sup>34</sup>, R. Nick Bryan<sup>3</sup>,  
16 Susan M. Resnick<sup>25</sup>, Yong Fan<sup>2</sup>, Mohamad Habes<sup>35</sup>, David Wolk<sup>2,36</sup>, Haochang Shou<sup>2,5</sup>, and Christos  
17 Davatzikos<sup>2\*</sup>

18  
19 <sup>1</sup>Laboratory of AI and Biomedical Science (LABS), Stevens Neuroimaging and Informatics Institute, Keck School of  
20 Medicine of USC, University of Southern California, Los Angeles, California, USA.

21 <sup>2</sup>Artificial Intelligence in Biomedical Imaging Laboratory (AIBIL), Center for Biomedical Image Computing and  
22 Analytics, Perelman School of Medicine, University of Pennsylvania, Philadelphia, USA.

23 <sup>3</sup>Department of Radiology, University of Pennsylvania, Philadelphia, USA.

24 <sup>4</sup>Department of Psychiatry, Perelman School of Medicine, University of Pennsylvania, Philadelphia, USA

25 <sup>5</sup>Penn Statistics in Imaging and Visualization Center, Department of Biostatistics, Epidemiology, and Informatics,  
26 Perelman School of Medicine, University of Pennsylvania, Philadelphia, USA

27 <sup>6</sup>Department of Radiology and Institute for Informatics, Washington University School of Medicine, St. Louis, USA

28 <sup>7</sup>Biomedical Imaging Group, EPFL, Lausanne, Switzerland

29 <sup>8</sup>Department of Biostatistics, Epidemiology and Informatics University of Pennsylvania Perelman School of Medicine,  
30 Philadelphia, USA

31 <sup>9</sup>Department of Genetics and Institute for Biomedical Informatics, Perelman School of Medicine, University of  
32 Pennsylvania, Philadelphia, PA, USA

33 <sup>10</sup>Department of Psychological Medicine, Institute of Psychiatry, Psychology and Neuroscience, King's College  
34 London, London, UK

35 <sup>11</sup>Department of Psychiatry, Icahn School of Medicine at Mount Sinai, New York, USA

36 <sup>12</sup>Department of Psychiatry, University Medical Center Utrecht, Utrecht, Netherlands

37 <sup>13</sup>Institute of Psychiatry, Faculty of Medicine, University of São Paulo, São Paulo, Brazil

38 <sup>14</sup>Department of Psychiatry and Psychotherapy, HHU Düsseldorf, Germany

39 <sup>15</sup>Hospital Universitario Virgen del Rocío, University of Sevilla-IBIS; IDIVAL-CIBERSAM, Sevilla, Spain

40 <sup>16</sup>Melbourne Neuropsychiatry Centre, Department of Psychiatry, University of Melbourne and Melbourne Health,  
41 Carlton South, Australia

42 <sup>17</sup>Orygen and the Centre for Youth Mental Health, University of Melbourne; and the School of Psychology,  
43 University of Birmingham, UK

44 <sup>18</sup>Key Laboratory of Real Time Tracing of Brain Circuits in Psychiatry and Neurology (RTBCPN-Lab), Nankai  
45 University Affiliated Tianjin Fourth Center Hospital; Department of Psychiatry, Tianjin Medical University, Tianjin,  
46 China

47 <sup>19</sup>Department of Psychiatry and Psychotherapy, Ludwig-Maximilian University, Munich, Germany

48 <sup>20</sup>Radiology and Imaging Sciences, Center for Neuroimaging, Department of Radiology and Imaging Sciences,  
49 Indiana Alzheimer's Disease Research Center and the Melvin and Bren Simon Cancer Center, Indiana University  
50 School of Medicine, Indianapolis

51 <sup>21</sup>Imaging Genetics Center, Mark and Mary Stevens Neuroimaging and Informatics Institute, Keck School of  
52 Medicine of USC, University of Southern California, Marina del Rey, California

53 <sup>22</sup>Sorbonne Université, Institut du Cerveau - Paris Brain Institute - ICM, CNRS, Inria, Inserm, AP-HP, Hôpital de la  
54 Pitié Salpêtrière, F-75013, Paris, France  
55 <sup>23</sup>Department of Psychiatry and Psychotherapy, German Center for Neurodegenerative Diseases (DZNE), University  
56 Medicine Greifswald, Germany  
57 <sup>24</sup>Department of Radiology and Biomedical Imaging, University of California, San Francisco, CA, USA  
58 <sup>25</sup>Laboratory of Behavioral Neuroscience, National Institute on Aging, NIH, USA  
59 <sup>26</sup>Department of Radiology, Washington University School of Medicine, St. Louis, Missouri, USA  
60 <sup>27</sup>Cardiovascular Health Research Unit and Department of Epidemiology, University of Washington, Seattle, WA,  
61 USA  
62 <sup>28</sup>Neuroepidemiology Section, Intramural Research Program, National Institute on Aging, Bethesda, Maryland, USA  
63 <sup>29</sup>Sticht Center for Healthy Aging and Alzheimer's Prevention, Wake Forest School of Medicine, Winston-Salem,  
64 North Carolina, USA  
65 <sup>30</sup>Florey Institute of Neuroscience and Mental Health, The University of Melbourne, Parkville, VIC, Australia  
66 <sup>31</sup>CSIRO Health and Biosecurity, Australian e-Health Research Centre CSIRO, Brisbane, Queensland, Australia  
67 <sup>32</sup>Wisconsin Alzheimer's Institute, University of Wisconsin School of Medicine and Public Health, Madison,  
68 Wisconsin, USA  
69 <sup>33</sup>Knight Alzheimer Disease Research Center, Washington University in St. Louis, St. Louis, MO, USA  
70 <sup>34</sup>Department of Neurology, Johns Hopkins University School of Medicine, USA  
71 <sup>35</sup>Glenn Biggs Institute for Alzheimer's & Neurodegenerative Diseases, University of Texas Health Science Center at  
72 San Antonio, San Antonio, USA  
73 <sup>36</sup>Department of Neurology and Penn Memory Center, University of Pennsylvania, Philadelphia, USA  
74  
75 \*Corresponding authors:  
76 Junhao Wen, Ph.D. – [junhaowe@usc.edu](mailto:junhaowe@usc.edu)  
77 2025 Zonal Ave, Los Angeles, CA 90033, United States  
78 Christos Davatzikos, Ph.D. – [Christos.Davatzikos@pennmedicine.upenn.edu](mailto:Christos.Davatzikos@pennmedicine.upenn.edu)  
79 3700 Hamilton Walk, 7th Floor, Philadelphia, PA 19104, United States  
80

81 **eText 1: Sensitivity check analysis for the GWAS using PSC C32\_1**  
82 **eText 2: Institutional Review Board (IRB) statement**  
83 **eText 3: The four datasets and populations defined in this study**  
84 **eMethod 1: Empirical validation of sopNMF**  
85 **eMethod 2: Reproducibility index**  
86 **eMethod 3: Inter-site image harmonization**  
87 **eMethod 4: Quality check of the image processing pipeline**  
88 **eMethod 5 Definition of the index, candidate, independent significant, and SNP and**  
89 **genomic locus**  
90 **eMethod 6 Cross-validation procedure for PAML**  
91 **eFigure 1: Comparison between opNMF and sopNMF**  
92 **eFigure 2: Reproducibility of the sopNMF brain parcellation**  
93 **eFigure 3: Scatter plot for the  $h^2$  estimates from the discovery and replication sets**  
94 **eFigure 4: Sensitivity check for the GWAS results using the discovery set in UKBB**  
95 **eFigure 5: Machine learning performance for disease classification and age prediction**  
96 **eFigure 6: Annotation of MUSE PSCs to MuSIC PSCs based on the overlap index**  
97 **eFigure 7: Summary statistics of the multi-scale PSCs of MuSIC**  
98 **eTable 1: Study cohort characteristics**  
99 **eTable 2: Clinical phenotypes and diagnoses used in machine learning classification**  
100 **eTable 3: Comparison of variants identified via MuSIC with other studies**  
101 **eTable 4: Classification balanced accuracy for disease classification and effect size of these**  
102 **imaging signatures**  
103 **eTable 5: 119 MUSE gray matter regions of interest**  
104 **eAlgorithm 1: Algorithm for sopNMF**  
105

106 **eText 1: Sensitivity check analysis for the GWAS using PSC C32\_1**

107 We used the GWAS results (233 significant SNPs in 5 genomic loci) of the first PSC in C32  
108 (C32\_1) from the UKBB discovery set to demonstrate this.

109 We replicated all the 233 significant SNPs in 5 genomic loci both at the nominal level ( $-\log_{10}[\text{p-value}] > 1.31$ ), and the Bonferroni corrected p-value threshold ( $-\log_{10}[\text{p-value}] > 3.67$ )  
110 using the combined discovery and replication sets ( $N=33,541$ ) (**SI eFigure 4b**), the 20,438  
111 participants with all ancestries in the discovery set (**SI eFigure 4c**), and the 16,743 participants  
112 in the discovery set with four additional imaging-related covariates (3 parameters for the brain  
113 position in the lateral, longitudinal, and transverse directions, and 1 parameter for the head  
114 motion from fMRI) (**SI eFigure 4d**). While replicating the results in 2386 participants with non-  
115 European ancestries, we only replicated 41 SNPs (17.6%), passing the nominal significant  
116 threshold (**SI eFigure 4e**). Finally, only 14 SNPs (6.4%) were replicated when replicating the  
117 results using 1481 whole-genome sequencing (WGS) data from ADNI consolidated by the  
118 AI4AD consortium<sup>16</sup> (**SI eFigure 4f**). The low replication rates in other ancestries and  
119 independent disease-specific populations are expected due to population stratification, disease-  
120 specific effects, and reduced sample sizes. This further emphasizes the urge to enrich and  
121 diversify genetic research with non-European ancestries and disease-specific populations.

123

124 **eText 2: Institutional Review Board (IRB) statement**

125 All individual studies were approved by their local corresponding Institutional Review Boards  
126 (IRB). The iSTAGING and PHENOM consortia consolidated all individual imaging and clinical  
127 data; imputed genotype data were directly downloaded from the UKBB website. Data from the  
128 UKBB for this project pertains to application 35148. For iSTAGING, the IRB at the University  
129 of Pennsylvania (protocol number: 825722) reviewed the research proposal on August 31<sup>st</sup>, 2016,  
130 and updated it on August 31<sup>st</sup>, 2022. No human subjects were recruited or scanned. Existing de-  
131 identified data will be used in this mega-analysis study pooling data from 17 studies: BLSA,  
132 ADNI1, ADNI2, ADNI3, ACCORD-MIND, LookAhead, SPRINT, CARDIA, MESA, SHIP,  
133 BIOCARD, WRAP, Penn-ADC, WHIMS-MRI, AIBL, OASIS, UKBB, MESA, HANDLS. For  
134 PHENOM, the IRB at the University of Pennsylvania (protocol number: 828077) reviewed the  
135 research proposal on August 19<sup>th</sup>, 2017. No human subjects were recruited or scanned. Existing  
136 de-identified data will be used in this meta-analysis study pooling data from 10 studies at Penn,  
137 Ludwick-Maximmilian University of Munich, Kings College-London, University of Utrecht,  
138 University of Melbourne, University of Cantabria, University of Sao Paolo, Xijing Hospital  
139 Shaanxi, Tianjin Anning Hospital, and Institute of Mental Health Peking University.

140

141 **eText 3: The four datasets and populations defined in this study**

142 We defined four populations or data sets per analysis across the paper: *i) discovery set, ii)*  
143 *replication set, iii) training population, and iv) comparison population* (refer to **SI eText 2** for  
144 details).

- 145 • Discovery set: It consists of a multi-disease and lifespan population that includes  
146 participants from all 12 studies ( $N=32,440$ ). Note that this population does not contain  
147 the entire UKBB population but only our first download (July 2017,  $N=21,305$ ).
- 148 • Replication set: We held 18,259 participants from the UKBB dataset to replicate the  
149 GWAS results. We took these data from our second download of the UKBB dataset  
150 (November 2021,  $N=18,259$ ).
- 151 • Training population: We randomly drew 250 patients (PT), including AD, MCI, SCZ,  
152 ASD, MDD, HTN (hypertension), DM (diabetes mellitus), and 250 healthy controls  
153 (CN) per decade from the discovery set, ensuring that the PT and CN groups have  
154 similar sex, study and age distributions. The resulting set of 4000 imaging data was used  
155 to generate the MuSIC atlas with the sopNMF algorithm. The rationale is to maximize  
156 variability across a balanced sample of multiple diseases or risk conditions, age, and  
157 study protocols rather than overfit the entire data by including all images in training.
- 158 • Comparison population: To validate sopNMF compared to the original opNMF  
159 algorithm, we randomly subsampled 800 participants from the training population (100  
160 per decade for balanced CN and PT). For this scale of sample size, opNMF can load all  
161 images into memory for batch learning.<sup>1</sup>

162

163 **eMethod 1: Empirical validation of sopNMF.**

164 For the empirical validation of sopNMF, the comparison population (**Method 1** in the main  
165 manuscript) was used so that the machine's memory could be sufficient to read the entire data for  
166 opNMF. For sopNMF, different choices of batch size (i.e., BS=32, 64, 128, and 256) were  
167 tested. We hypothesized that sopNMF could approximate the optima of opNMF during  
168 optimization, i.e., resulting in similar parts-based representation, training loss, and sparsity.  
169 TensorboardX was embedded into the sopNMF framework to monitor the training process  
170 dynamically. All experiments were performed on an Ubuntu machine with a maximum RAM of  
171 32 GB and 8 CPUs. The predefined maximum number of epochs for all experiments is 50,000,  
172 and the tolerance of early stopping criteria is 100 epochs based on the training loss.

173 We qualitatively compared the extracted PSCs and quantitatively for the training loss, the  
174 sparsity of the component matrix  $W$ , and the memory consumption for  $C=20$  (number of PSCs).  
175 The 20 PSCs were spatially consistent between opNMF and sopNMF, despite that some regions  
176 were decomposed into different PSCs (i.e., the white ellipse in **eFig. 1A**). For the training loss,  
177 opNMF obtained the lowest loss ( $1.103 \times 10^6$ ), and the loss of sopNMF were  $1.107 \times 10^6$ ,  $1.108$   
178  $\times 10^6$ ,  $1.111 \times 10^6$  and  $1.210 \times 10^6$  for BS =256, 128, 64, and 32, respectively (**eFig. 1D**). For the  
179 sparsity of the component matrix, all models obtained comparable results (sparsity  $\approx 0.83$ , **eFig.**  
180 **1E**). The estimated memory consumptions during the training process were 28.65, 4.02, 3.81,  
181 2.60, 1.47 GB for opNMF and sopNMF (BS =256, 128, 64, and 32), respectively  
182 (**Fig. e1F**).

183

184 **eMethod 2: Reproducibility index.**

185 We proposed a reproducibility index (RI) to test the reproducibility of sopNMF for brain

186 parcellation:

- 187 • We used the Hungarian match algorithm<sup>2</sup> to match the pairs of PSCs between two splits  
188 under the specific condition that maximizes the similarity (i.e., minimizes the cost of  
189 workers/jobs in its original formulation).
- 190 • For each pair of PSCs, we calculated the inner product of the vectors ( $R^d$ ), referred to as  
191 RI. This index takes values between [0, 1], with higher values indicating higher  
192 reproducibility.
- 193 • For each scale  $C$ , we presented the mean/standard deviation of the RIs for all PSCs.

194

195

196



197 **eMethod 3: Inter-site image harmonization**

198 We used an extensively validated statistical harmonization approach, i.e., ComBat-GAM,<sup>3</sup> to  
199 harmonize the extracted multi-scale PSCs. This method estimates the variability in volumetric  
200 measures due to differences in site/cohort-specific imaging protocols based on variances observed  
201 within and across control groups while preserving normal variances due to age, sex, and  
202 intracranial volume (ICV) differences. The model was initially trained on the discovery set and  
203 then applied to the replication set.

204

205 **eMethod 4: Quality check of the image processing pipeline.**

206 Raw T1-weighted MRIs were first quality checked (QC) for motion, image artifacts, or restricted  
207 field-of-view. Another QC was performed: First, the images were examined by manually  
208 evaluating for pipeline failures (e.g., poor brain extraction, tissue segmentation, and registration  
209 errors). Furthermore, a second step automatically flagged images based on outlying values of  
210 quantified metrics (i.e., PSC values); those flagged images were re-evaluated.

211

212 **eMethod 5: Definition of the index, candidate, independent significant, and lead SNP and**  
213 **genomic locus.**

214 *Index SNP*

215 They are defined as SNPs with a p-value threshold  $\leq 5e-8$  (*clump-p1*) from GWAS summary  
216 statistics.

217 *Independent significant SNP*

218 They are defined as the index SNPs, which are independent of each other (not in linkage  
219 disequilibrium) with  $r^2 \leq 0.6$  (*clump-r2*) within 250 kilobases (non-overlapping, *clump-kb*) away  
220 from each other.

221 *Lead SNP and genomic loci*

222 They are defined as the independent significant SNPs, which are independent of each other with  
223 a more stringent  $r^2 \leq 0.1$  (*clump-r2*) within 250 kilobases (non-overlapping, *clump-kb*) away  
224 from each other. Each of these clumps is defined as a *genomic locus*.

225 *Candidate SNP*

226 With each genomic locus, candidate SNPs are defined as the SNPs whose association p-values  
227 are smaller than 0.05 (*clump-p2*). The definitions followed instructions from FUMA<sup>4</sup> and Plink<sup>5</sup>  
228 software.

229 **eMethod 6: Cross-validation procedure for PAML.**

230 Nested cross-validation was adopted for all tasks following the good-practice guidelines  
231 proposed in our previous works<sup>6-8</sup>. In particular, an outer loop was used to evaluate the task  
232 performance (250 repetitions of random hold-out splits with 80% of data for training). In  
233 contrast, an inner loop focused on tuning the hyperparameters (10-fold splits). We computed the  
234 balanced accuracy (BA) to evaluate the classification tasks. We calculated the effect size  
235 (Cohen's  $d$ ) and p-value for each SPARE index to quantify its discriminative power.  
236

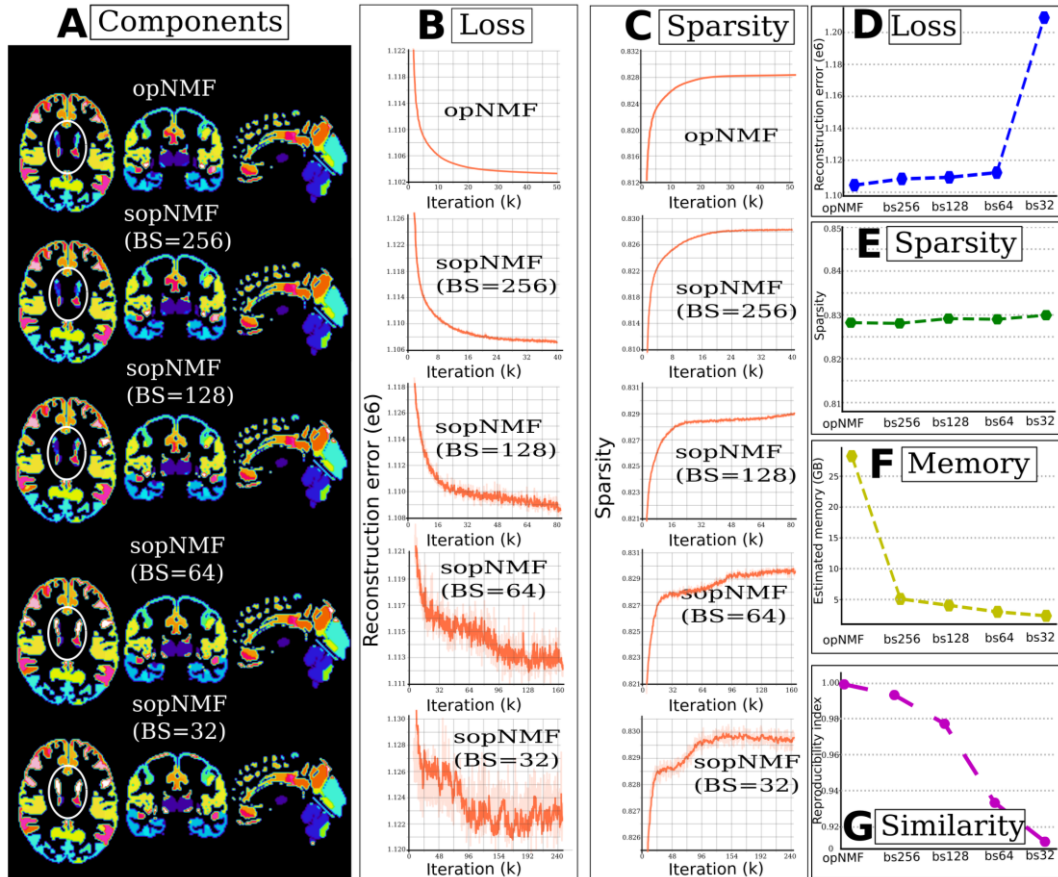

237  
238  
239  
240  
241  
242  
243  
244

**eFigure 1: Comparison between opNMF and sopNMF.** (A) Qualitative evaluation: The extracted components are shown in the original image space, with each PSC displayed in a distinct color. The white ellipse indicates the region where the models diverge. Quantitative evaluation: training loss (B, D) and sparsity (C, E) demonstrated similar patterns between models, except that batch size (BS) = 32 had a larger loss than the other models. Comparing the estimated memory consumption during training across models shows significant advantages for all sopNMF models compared to opNMF.

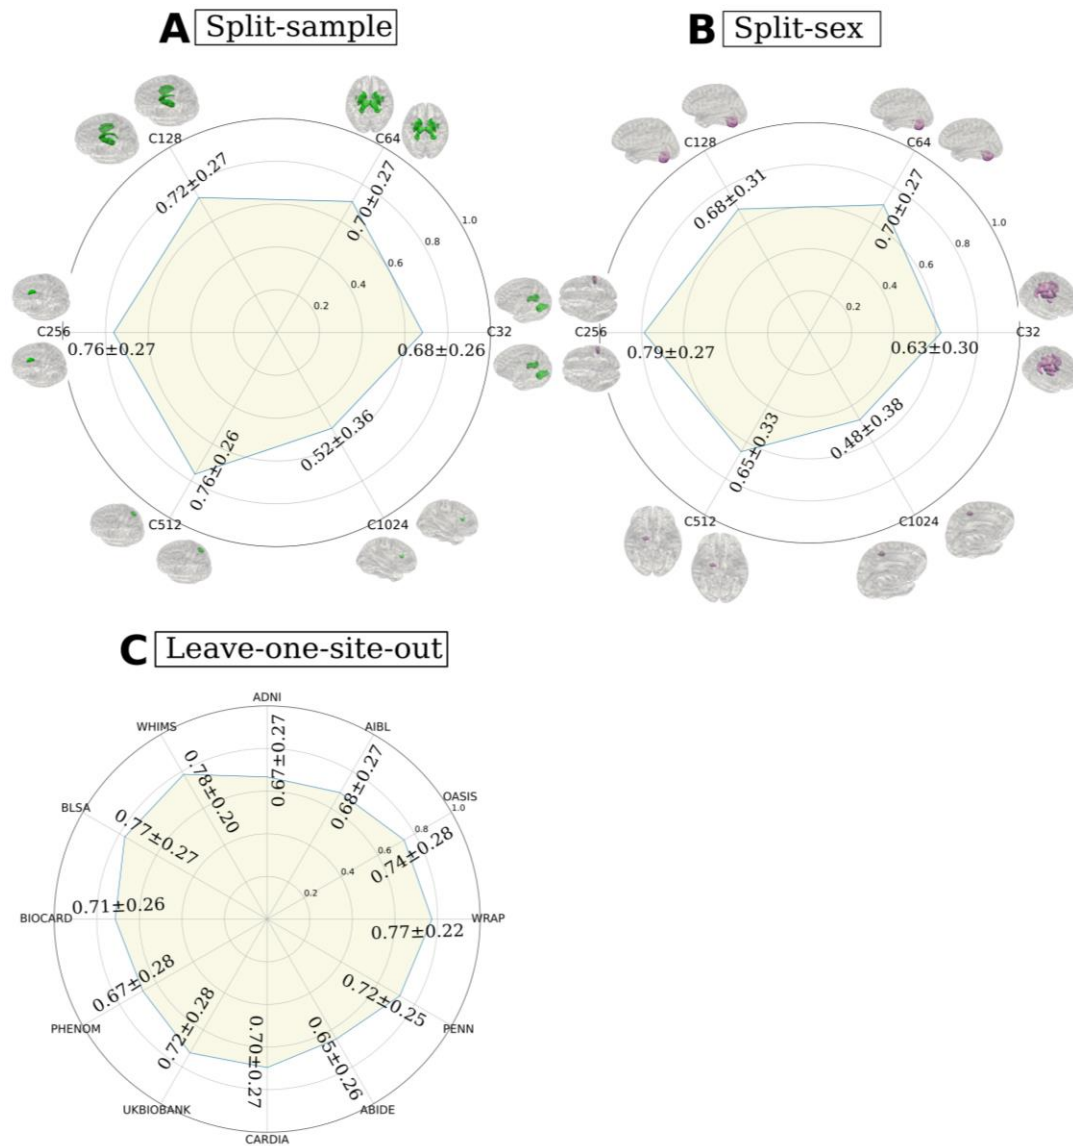

245  
 246 **eFigure 2: Reproducibility of the sopNMF brain parcellation.** In general, sopNMF  
 247 demonstrated high reproducibility under various conditions. For each brain PSC, the  
 248 reproducibility index (RI) was calculated (**Supplementary eMethod 2**). (A) Split-sample  
 249 analyses, where the training population ( $N=4000$ ) was randomly split into two halves while  
 250 maintaining similar age, sex, and site distribution between groups. (B) Split-sex  
 251 analyses, where the training population was divided into males and females. Colored PSCs on the brain template  
 252 illustrate the same PSC independently derived from the two splits. (C) Leave-one-site-out  
 253 analyses for C32 PSCs., where the training populations excluding participants from each site  
 254 (BIOCARD, ADNI, WARP, AIBL, ABIDE, BLSA, OASIS, CARDIA, PHENOM, PENN,  
 255 UKBB, and WHIMS) were independently trained with sopNMF. The RI indices were compared  
 256 to the sopNMF results using the full training sample ( $N=4000$ ).  
 257

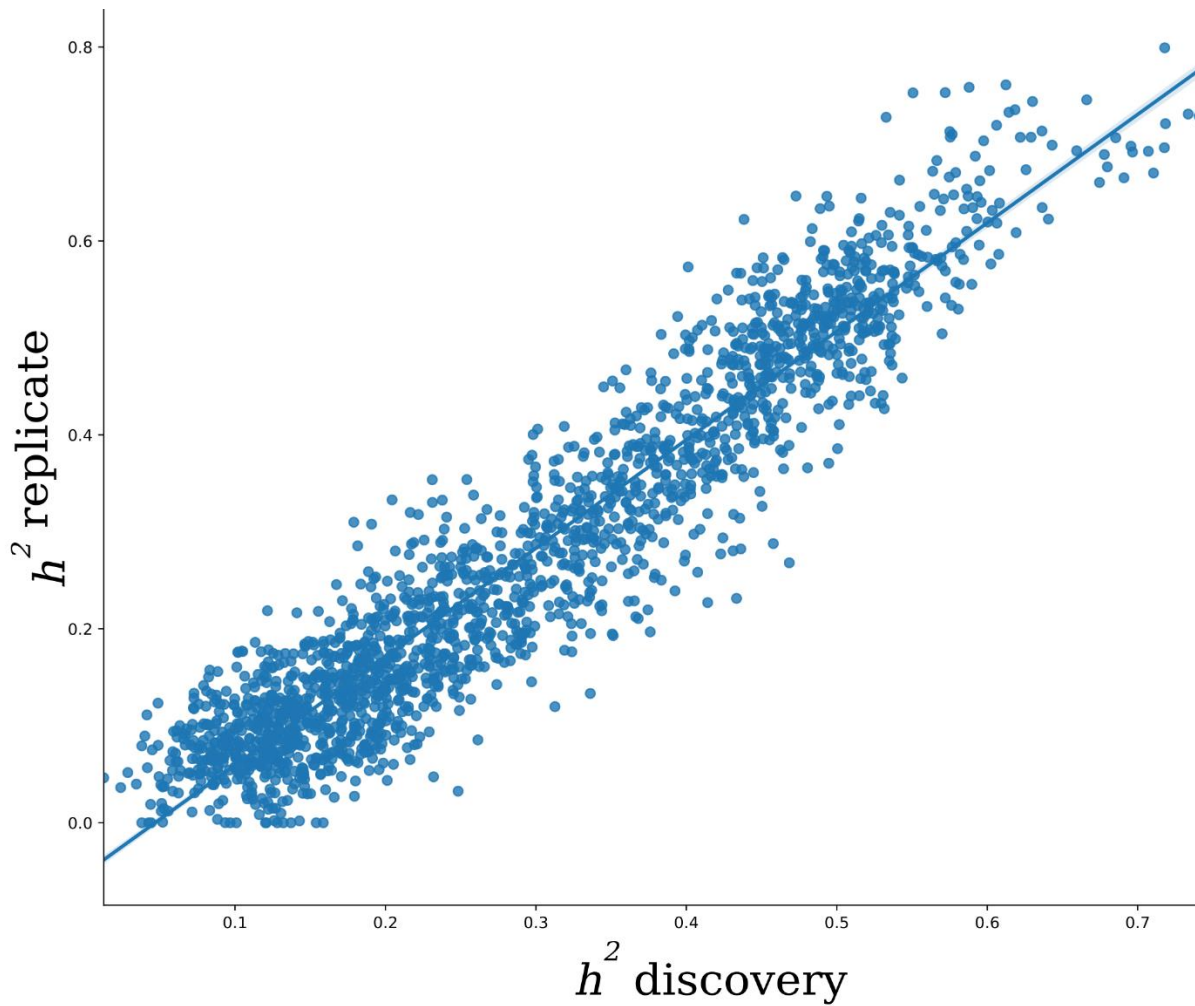

259  
260  
261  
262  
263  
264  
265

**Figure 3: Scatter plot for the  $h^2$  estimates from the discovery and replication sets.** The SNP-based heritability was estimated independently for the discovery set ( $N=18,052$ ) and replication set ( $N=15,243$ ). In particular, the two estimates were highly correlated ( $r = 0.94$ ,  $p$ -value  $< 10^{-6}$ ), demonstrating a highly similar genetic architecture across different sets of UKBB data.

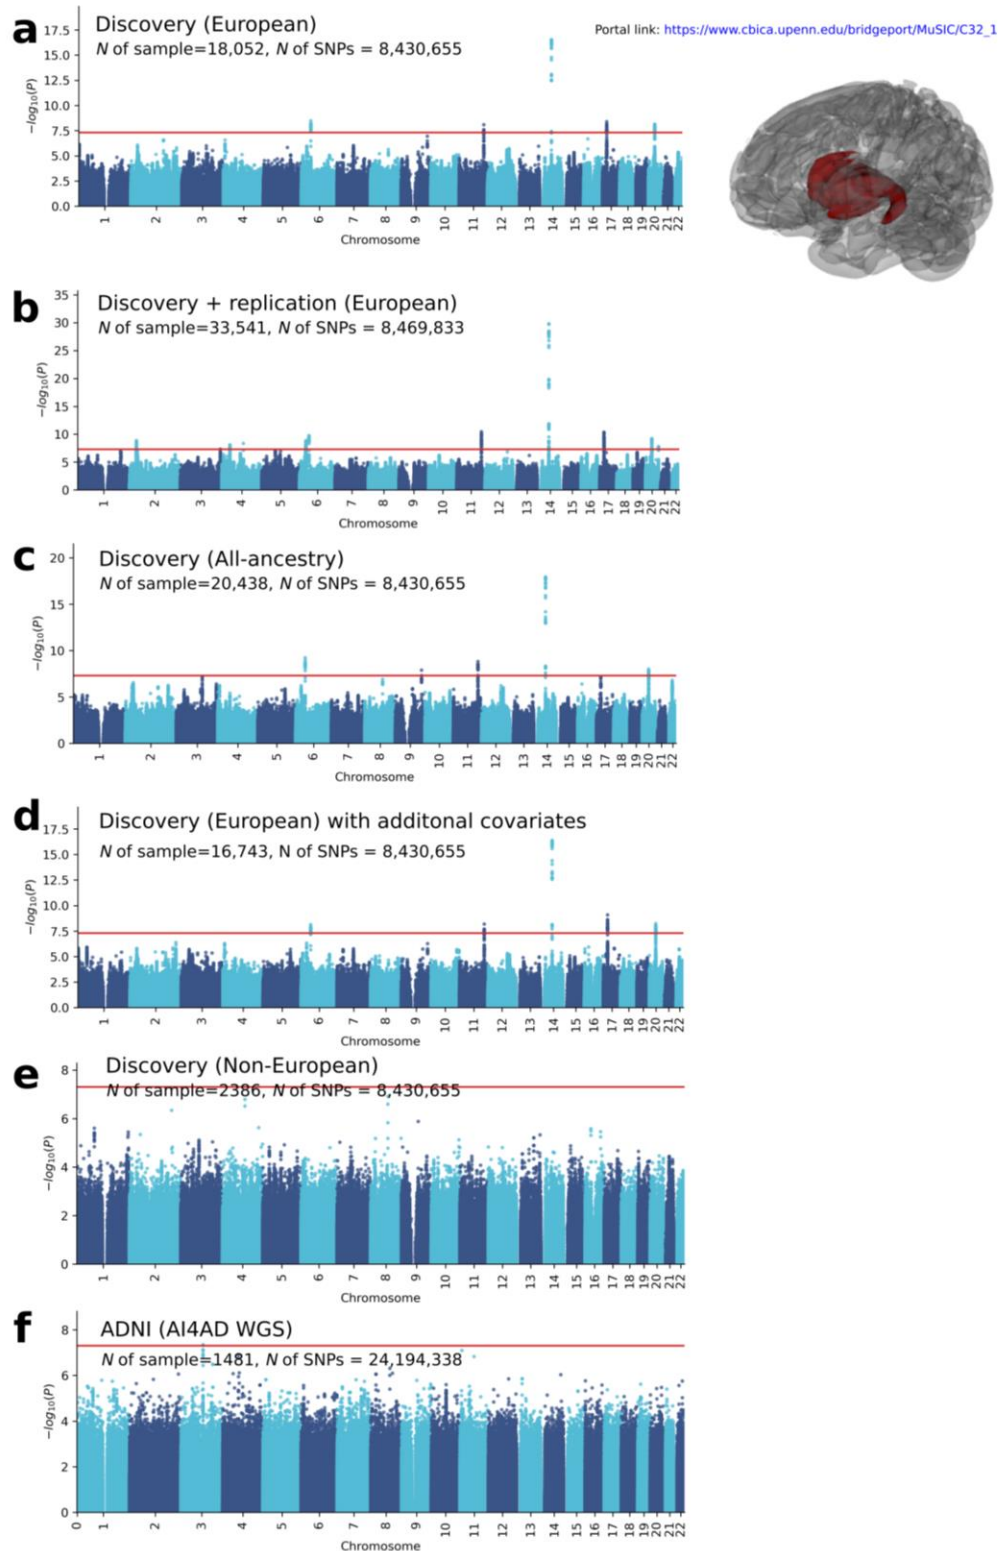

266  
267  
268  
269  
270

**eFigure 4: Sensitivity check for the GWAS results using the discovery set in UKBB.** **A)** The GWAS results for participants with European ancestry in the discovery set. **B)** The GWAS results for participants with European ancestry in the discovery and replication sets. **C)** The GWAS results for participants with all different ancestries in the discovery set. **D)** The GWAS



271 results for participants with European ancestry in the discovery set by adding four additional  
272 imaging-related covariates. **E)** The GWAS results for participants with non-European ancestry in  
273 the discovery set. **F)** The GWAS results for participants with the independent ADNI WGS data.

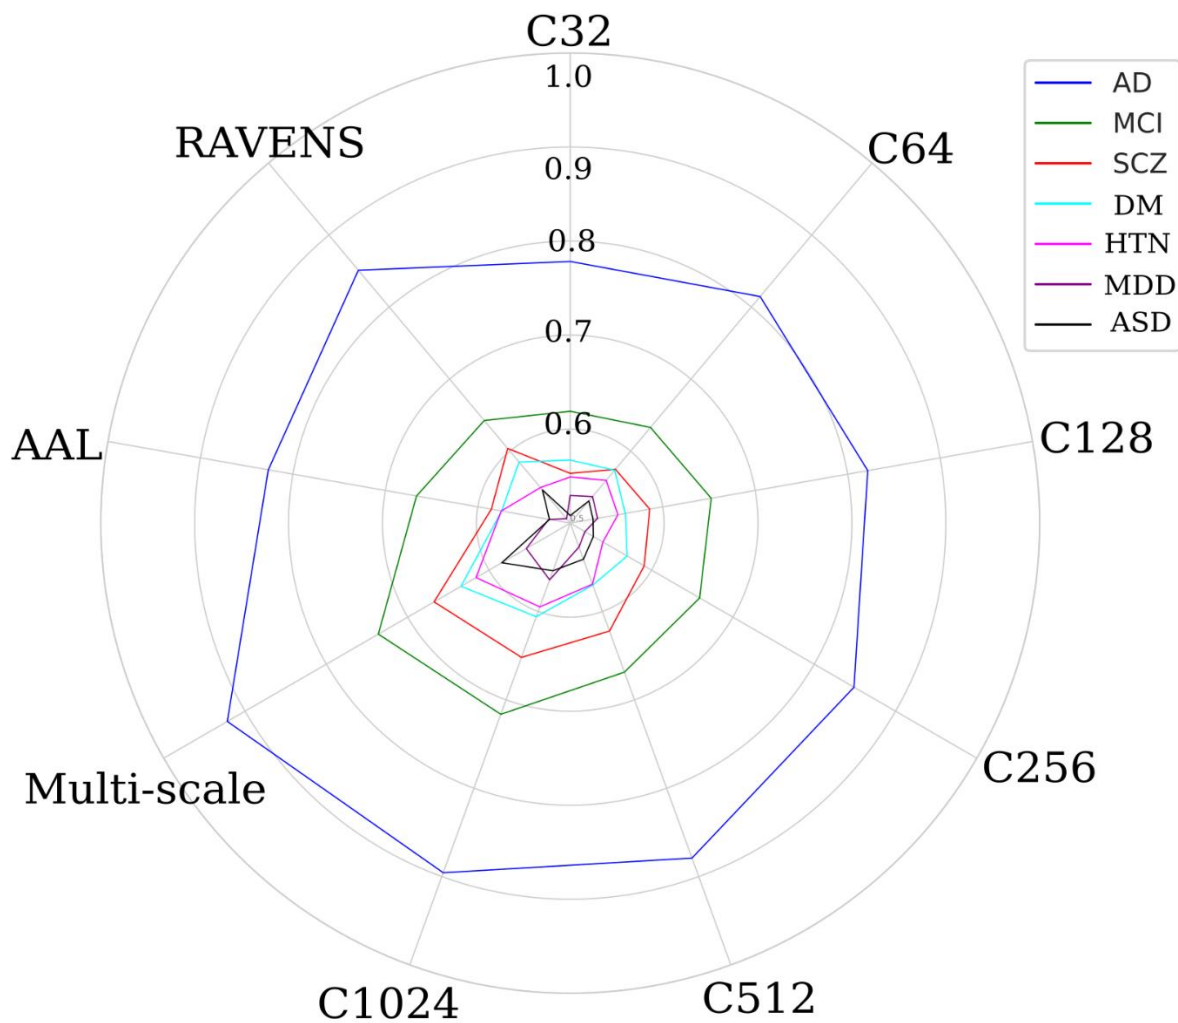

274  
 275 **eFigure 5: Machine learning performance for disease classification.** Balanced accuracy (BA)  
 276 for each classification task using different features from multi-scale MuSIC, AAL, and RAVENS  
 277 (higher score better). Details are presented in **eTable 4**.  
 278

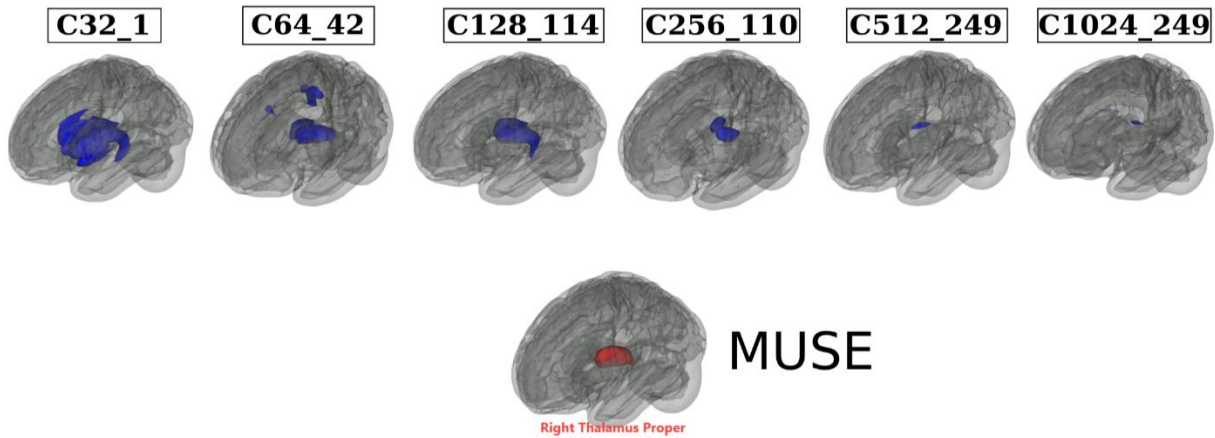

279  
280  
281  
282  
283  
284  
285  
286  
287  
288  
289  
290

**eFigure 6: Annotation of MUSE ROIs to MuSIC PSCs based on the overlap index.** We automatically annotated the 119 MUSE GM PSCs to the MuSIC atlases at all six scales ( $C=32, 64, 128, 256, 512,$  and  $1024$ ). To this end, we calculated an overlap index (OI) to quantify the spatial overlaps between MUSE and MuSIC. For instance, for each MUSE PSC (**eTable 5**) vs. each of the 32 PSCs of MuSIC at  $C=32$  scale, the OI equals the proportion of the number of overlap voxels and the total number of voxels in the MUSE PSC. Here we illustrate by mapping the right thalamus of MUSE to all 6 MuSIC atlases. The highest OIs are 0.82, 0.70, 0.86, 0.30, 0.09, 0.05 for C32\_1, C64\_42, C128\_114, C256\_110, C512\_249, and C1024\_249 PSCs. This functionality is available in BRIDGEPORT:

<https://www.cbica.upenn.edu/bridgeport/MUSE/Right%20Thalamus%20Proper>

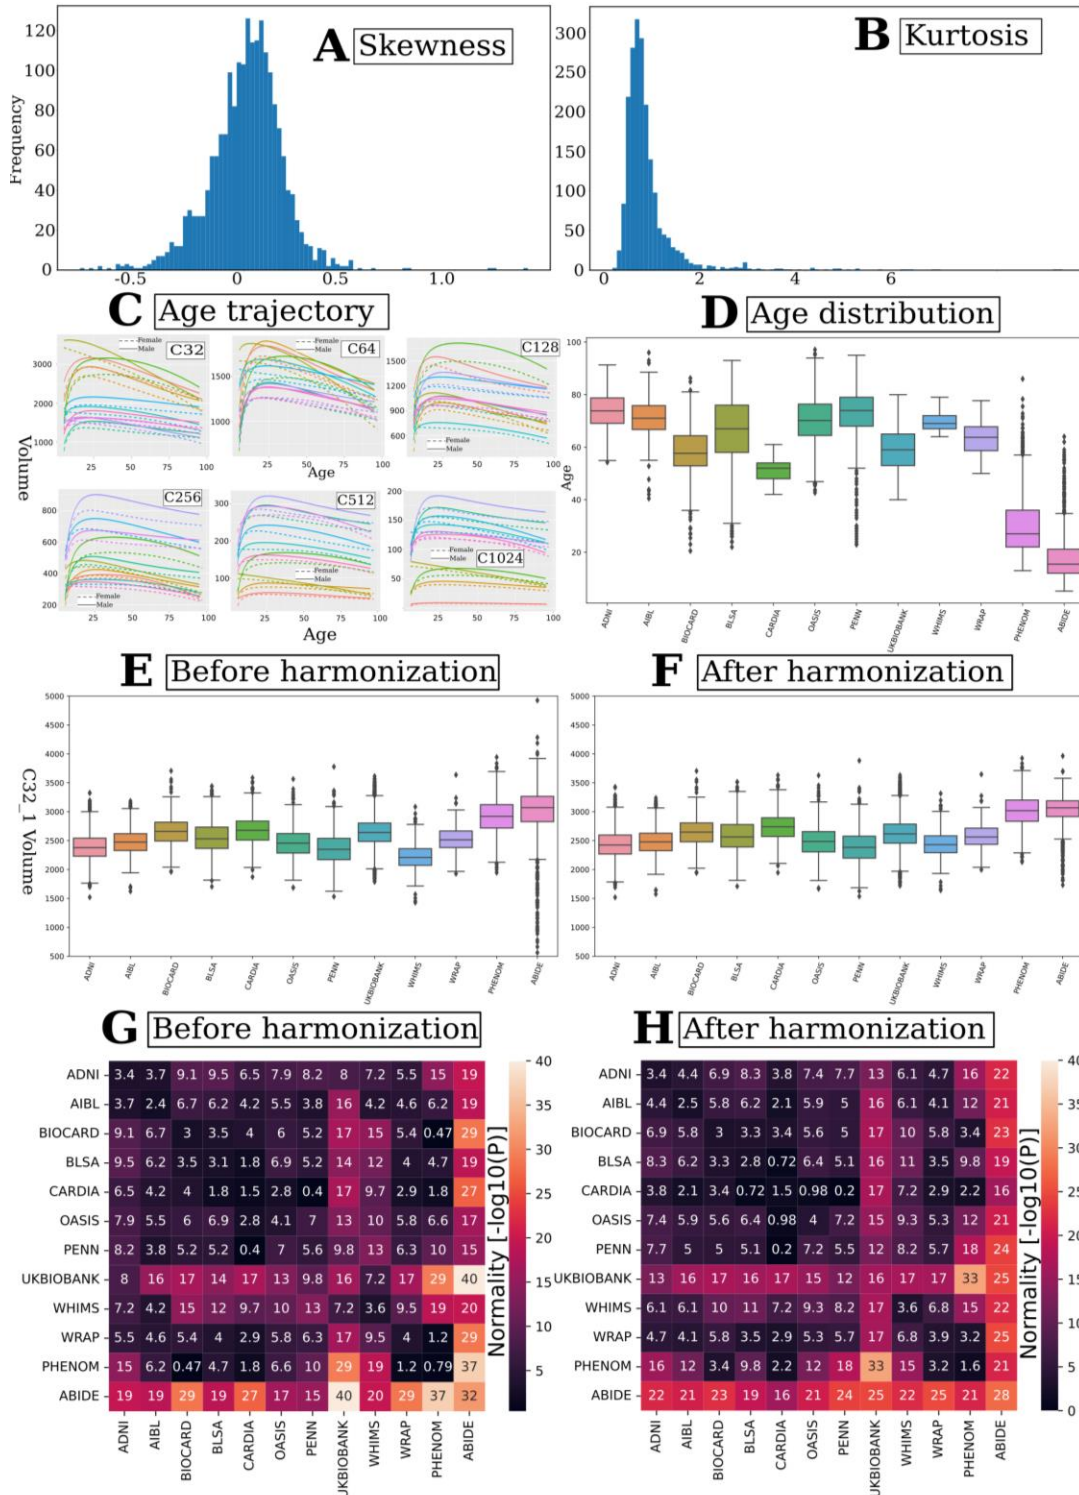

291  
 292 **eFigure 7: Summary statistics of the multi-scale PSCs of MuSIC.** Multi-scale PSCs show  
 293 considerable normal distributions, i.e., symmetrical distribution (A) with a low kurtosis (B).  
 294 Moreover, we fit the Generalized Additive Model for Location, Scale, and Shape (GAMLSS)<sup>9</sup>  
 295 model (fractional polynomials with 2 degrees) to each PSC to delineate the age trajectory over  
 296 the lifespan in males (solid lines) and females (dotted lines), respectively (C). For visualization

297 purposes, we selectively display the first 10 PSCs from each scale of the MuSIC atlases. In  
298 general, males have larger brain volumes than females. For **D-F**, we selectively showed the  
299 distribution of age (**D**) and the distribution of PSC volume before harmonization (**E**) and after  
300 harmonization (**F**) for C32\_1 within each site in the discovery set. For **G** and **H**, we tested the  
301 normality of the PSC volume (C32\_1) from each pair of sites using the Shapiro-Wilk test  
302 (*scipy.stats.shapiro* function) in the discovery set before (**G**) harmonization and after  
303 harmonization (**H**). A higher  $-\log_{10}(P)$  indicates the data are less likely to be normally  
304 distributed. As a general trend, our statistical harmonization techniques demonstrated a slight  
305 improvement in the normality of the data. Additionally, we consistently applied normality  
306 transformations to all statistical analyses, including GWAS, to mitigate any non-normality.  
307

308 **eTable 1. Study cohort characteristics.**

309 The current study consists of two main populations/sets: the discovery set ( $N=32,440$ , including  
 310 participants from the first download of the UKBB data) and the replication set ( $N=18,259$ , the  
 311 second download of the UKBB data). To train the sopNMF model for MuSIC, we selected 250  
 312 patients (PT) and 250 healthy controls (CN) for each decade of the discovery set, resulting in  
 313 4000 participants in total, referred to as the training population. Age ranges from 5 to 97 years  
 314 and is shown with mean and standard deviation. Sex is displayed with the number and  
 315 percentage of female participants. Data was collected from 12 studies, 130 sites, and 12  
 316 countries. The number of sites (country) per study is detailed as follows:

- 317 • ADNI: 63 sites (USA)
- 318 • UKBB: 5 sites (UK)
- 319 • AIBL: 2 sites (Australia)
- 320 • BIOCARD: 2 sites (USA)
- 321 • BLSA: 1 site (USA)
- 322 • CARDIA: 3 sites (USA)
- 323 • OASIS: 1 site (USA)
- 324 • PENN: 1 site (USA)
- 325 • WHIMS: 14 sites (USA)
- 326 • WRAP 1 site (USA)
- 327 • PHENOM: 12 sites (China, Brazil, Australia, Germany, Spain, USA, Netherlands)
- 328 • ABIDE: 25 sites (USA, Netherlands, Belgium, Germany, Ireland, Switzerland, France)

329 Abbreviations: CN: healthy control; AD: Alzheimer's disease; MCI: mild cognitive impairment;  
 330 SCZ: schizophrenia; ASD: autism spectrum disorder; MDD: major depressive disorder; DM:  
 331 diabetes; HTN: hypertension.

332 <sup>a</sup>UKBB data were separately downloaded two times: the first was the  $N=21,305$  in the discovery  
 333 set, and the second was the replication set.

334 <sup>b</sup>We define CN (healthy controls) as participants that do not have any of the diseases listed here.  
 335 These CN participants might have diagnoses of other illnesses or comorbidities (e.g., participants  
 336 from UKBB have a wide range of pathology based on ICD-10).

337

| Study                | $N$<br>(50,699) | Age<br>(5-97<br>year) | Sex<br>(female/%<br>) | CN <sup>b</sup> | AD  | MCI  | SCZ  | ASD | MDD  | DM   | HTN |
|----------------------|-----------------|-----------------------|-----------------------|-----------------|-----|------|------|-----|------|------|-----|
| <b>Discovery set</b> | 32,440          | 60.04±<br>14.87       | 16,868/52             | 24,980          | 954 | 1288 | 1094 | 597 | 1476 | 1093 | 958 |
| ADNI                 | 1765            | 73.66±<br>7.19        | 798/45                | 297             | 343 | 875  | NA   | NA  | NA   | NA   | 250 |
| UKBB <sup>a</sup>    | 21,305          | 62.58±<br>7.48        | 10,101/53             | 18,735          | 1   | NA   | NA   | NA  | 1476 | 1093 | NA  |
| AIBL                 | 830             | 71.36±<br>6.78        | 471/57                | 625             | 86  | 115  | NA   | NA  | NA   | NA   | 4   |
| BIOCARD              | 288             | 58.15±<br>10.54       | 115/60                | 283             | 1   | 4    | NA   | NA  | NA   | NA   | NA  |
| BLSA                 | 1114            | 65.44±<br>14.11       | 589/53                | 729             | 9   | 11   | NA   | NA  | NA   | NA   | 365 |
| CARDIA               | 892             | 51.21±<br>3.98        | 471/53                | 620             | NA  | NA   | NA   | NA  | NA   | NA   | 272 |
| OASIS                | 983             | 69.92±<br>9.75        | 557/57                | 759             | 220 | NA   | NA   | NA  | NA   | NA   | 4   |

|                                        |        |                 |         |      |     |     |      |     |    |    |    |
|----------------------------------------|--------|-----------------|---------|------|-----|-----|------|-----|----|----|----|
| PENN                                   | 807    | 72.63±<br>10.65 | 333/59  | 173  | 294 | 283 | NA   | NA  | NA | NA | 57 |
| WHIMS                                  | 995    | 69.61±<br>3.64  | 995/100 | 986  | NA  | NA  | NA   | NA  | NA | NA | 6  |
| WRAP                                   | 116    | 63.36±<br>6.06  | 79/68   | 116  | NA  | NA  | NA   | NA  | NA | NA | NA |
| PHENOM                                 | 2125   | 30.21±<br>10.60 | 854/40  | 1031 | NA  | NA  | 1094 | NA  | NA | NA | NA |
| ABIDE                                  | 1220   | 17.92±<br>9.01  | 203/17  | 623  | NA  | NA  | NA   | 597 | NA | NA | NA |
| <b>Replication<br/>set<sup>a</sup></b> | 18,259 | 54.70±<br>7.43  | 9742/53 | NA   | NA  | NA  | NA   | NA  | NA | NA | NA |

338  
339

340 **eTable 2: Clinical phenotypes and diagnoses used in machine learning classification.**

341 We harmonized the population of the phenotypes of interest per study definitions:

- 342 • We combined AD and MCI patients from ADNI, PENN, and AIBL but excluded OASIS  
 343 subjects because of the different diagnostic criteria of an AD patient in OASIS.  
 344 • For several binary disease phenotypes, we used the ICD-10 diagnosis  
 345 (<https://biobank.ndph.ox.ac.uk/ukb/field.cgi?id=41270>). Note that ICD-10 diagnoses are  
 346 generally collected from the participants' medical inpatient records. We first included  
 347 diseases from the following categories:
- 348 ○ Diseases of the blood and blood-forming organs and certain disorders involving the  
 349 immune mechanism (D-XXX, XXX represents the ID of a specific disease);
  - 350 ○ Endocrine, nutritional, and metabolic diseases (E-XXX);
  - 351 ○ Mental and behavioral disorders (F-XXX);
  - 352 ○ Diseases of the nervous system (G-XXX);
  - 353 ○ Diseases of the circulatory system (I-XXX).

354 We then set a threshold of 75 patients for any ICD-10 diagnosis. We finally randomly  
 355 selected age and sex-matched healthy controls (excluding all patients in all diagnoses). <sup>a</sup>:  
 356 For major depressive disorder, we used the inclusion criteria from our previous work.<sup>10</sup>

- 357 • For cognitive scores, we included:
- 358 ○ Tower rearranging (<https://biobank.ndph.ox.ac.uk/showcase/field.cgi?id=21004>)
  - 359 ○ Matrix pattern (<https://biobank.ndph.ox.ac.uk/showcase/field.cgi?id=6373>)
  - 360 ○ TMT-A (<https://biobank.ndph.ox.ac.uk/showcase/field.cgi?id=6348>)
  - 361 ○ TMT-B (<https://biobank.ndph.ox.ac.uk/showcase/field.cgi?id=6350>)
  - 362 ○ DSST (<https://biobank.ndph.ox.ac.uk/showcase/field.cgi?id=23324>)
  - 363 ○ Pairs matching (<https://biobank.ndph.ox.ac.uk/showcase/field.cgi?id=399>)
  - 364 ○ Numerical memory (<https://biobank.ndph.ox.ac.uk/showcase/field.cgi?id=4282>)
  - 365 ○ Prospective memory (<https://biobank.ndph.ox.ac.uk/showcase/field.cgi?id=4288>)
  - 366 ○ Reaction time (<https://biobank.ndph.ox.ac.uk/showcase/field.cgi?id=20023>)
  - 367 ○ Fluid intelligence (<https://biobank.ndph.ox.ac.uk/showcase/field.cgi?id=20016>)

368 AD: Alzheimer's disease; MCI: mild cognitive impairment; SCZ: schizophrenia; DM: diabetes  
 369 mellitus; MDD: major depressive disorder; HTN: hypertension; ASD: autism spectrum disorder;  
 370 CN: healthy control; PT: patient; *N*: number of participants. We decided not to harmonize  
 371 cognitive scores from different studies.  
 372

| Trait (ICD-10 code or ID) | Sample size (CN/PT or <i>N</i> ) | Site                | Trait (ICD-10 code or ID)             | Sample size (CN/PT or <i>N</i> ) | Site |
|---------------------------|----------------------------------|---------------------|---------------------------------------|----------------------------------|------|
| AD                        | 1095/723                         | ADNI, PENN, & AIBL  | Carpal tunnel syndrome (G560)         | 901/901                          | UKBB |
| MCI                       | 1273/1095                        | ADNI, PENN, & AIBL  | Lesion of ulnar nerve (G562)          | 104/104                          | UKBB |
| SCZ                       | 1031/1094                        | PHENOM              | Lesion of plantar nerve (G576)        | 163/163                          | UKBB |
| DM                        | 1093/1093                        | UKBB                | Angina pectoris (I20)                 | 1535/1535                        | UKBB |
| MDD <sup>a</sup>          | 1476/1476                        | UKBB                | Acute myocardial infarction (I21)     | 769/769                          | UKBB |
| HTN                       | 934/887                          | ADNI, BLSA & CARDIA | Chronic ischaemic heart disease (I25) | 2217/2217                        | UKBB |



|                                       |           |       |                              |         |      |
|---------------------------------------|-----------|-------|------------------------------|---------|------|
| ASD                                   | 623/597   | ABIDE | Pulmonary embolism (I20)     | 351/351 | UKBB |
| Iron deficiency anemia (D50)          | 1012/1012 | UKBB  | Cardiomyopathy (I42)         | 116/116 | UKBB |
| Vitamin B12 deficiency anemia (D50)   | 78/78     | UKBB  | Paroxysmal tachycardia (I47) | 320/320 | UKBB |
| Agranulocytosis (D70)                 | 245/245   | UKBB  | Heart failure (I50)          | 436/436 | UKBB |
| Thyrotoxicosis (E05)                  | 205/205   | UKBB  | Cerebral infarction (I63)    | 291/291 | UKBB |
| Vitamin D deficiency (E55)            | 180/180   | UKBB  | Vitamin B deficiency (E53)   | 130/130 | UKBB |
| Obesity (E66)                         | 1481/1481 | UKBB  | Hemiplegia (G81)             | 111/111 | UKBB |
| Lipoprotein metabolism disorder (E78) | 3880/3880 | UKBB  | Facial nerve disorders (G51) | 95/95   | UKBB |
| Mineral metabolism disorder (E83)     | 291/291   | UKBB  | Tower rearranging (21004)    | 8412    | UKBB |
| Volume depletion                      | 240/240   | UKBB  | Matrix pattern (6373)        | 8501    | UKBB |
| Delirium                              | 92/92     | UKBB  | TMT-A (6348)                 | 8599    | UKBB |
| Alcohol abuse                         | 341/341   | UKBB  | TMT-B (6350)                 | 8599    | UKBB |
| Tobacco abuse                         | 863/863   | UKBB  | DSST (23324)                 | 8523    | UKBB |
| Bipolar affective disorder            | 77/77     | UKBB  | Pairs matching (399)         | 20945   | UKBB |
| Phobic anxiety disorder               | 84/84     | UKBB  | Numerical memory (4282)      | 9323    | UKBB |
| Multiple sclerosis                    | 109/109   | UKBB  | Prospective memory (4288)    | 19681   | UKBB |
| Epilepsy                              | 250/250   | UKBB  | Reaction time (20023)        | 21258   | UKBB |
| Migraine                              | 508/508   | UKBB  | Fluid intelligence (20016)   | 19184   | UKBB |
| Sleep disorders                       | 590/590   | UKBB  |                              |         |      |

373  
374

375 **eTable 3: Comparison of variants identified via MuSIC with other studies.** Using the AAL  
376 atlas, we found (using the same data in the current study) that 269 independent significant SNPs  
377 had 356 pairwise associations with 54 AAL brain regions. 230 out of the 269 SNPs matched with  
378 the SNPs in MuSIC. Among the 39 unmatched SNPs, 15 SNPs were in linkage disequilibrium  
379 (LD,  $r^2 > 0.6$ ) with MuSIC SNPs (**Supplementary eFile 5**). As a second example, Zhao et al.<sup>11</sup>  
380 reported that 251 independent significant SNPs had 346 pairwise associations with 43 GM regions  
381 using the Mindboggle atlas on the UKBB ( $N=19,629$ ).<sup>12</sup> 129 of the 251 SNPs matched with SNPs  
382 identified by MuSIC. Among these non-matching SNPs (127), 31 were in LD with MuSIC SNPs  
383 (**Supplementary eFile 6**). Similarly, Elliot et al.<sup>13</sup> ( $N=8428$ ) discovered that 20 independent  
384 significant SNPs had 58 pairwise associations with 52 GM regions from atlases in Freesurfer and  
385 FSL software. Out of the 20 SNPs, 16 coincided with MuSIC SNPs. Among the four unmatched  
386 SNPs, 1 SNP was in LD with MuSIC SNPs (**Supplementary eFile 7**). Note that the definition of  
387 independent significant SNPs or genomic loci might slightly differ between studies.

| Study/Atlas                 | Identified genomic loci | Matched loci | Loci in LD | Novel loci | Database | Sample size | Ancestry |
|-----------------------------|-------------------------|--------------|------------|------------|----------|-------------|----------|
| MuSIC                       | 915                     | NA           | NA         | NA         | UKBB     | 18,052      | European |
| AAL                         | 218                     | 162          | 13         | 740        | UKBB     | 18,052      | European |
| Zhao et al. <sup>11</sup>   | 251                     | 73           | 14         | 828        | UKBB     | 19,629      | European |
| Elliot et al. <sup>13</sup> | 20                      | 16           | 1          | 898        | UKBB     | 8428        | European |
| GWAS Catalog                | NA                      | 298          | NA         | 617        | NA       | NA          | NA       |

388  
389

390 **eTable 4: Classification balanced accuracy for disease classification and effect size of these**  
 391 **imaging signatures.**

392 Disease classification performance is presented using balanced accuracy. The mean and standard  
 393 deviation are presented. Cohen's  $d$  was computed to compare the SPARE scores between groups.  
 394 Multi-scale classification<sup>a</sup>: All 2003 PSCs from multiple scales were fit into the classifier.  
 395 Multi-scale classification<sup>b</sup>: PSCs from all scales were fit into the classifier with a nested feature  
 396 selection procedure (SVM-REF). The motivation is that PSCs from different scales are  
 397 hierarchical and correlated. The nested feature selection can select the features most relevant to  
 398 the specific task. We avoided any statistical comparison of the performance of machine learning  
 399 models because available statistical tests are liberal and often lead to false-positive conclusions  
 400 due to the complexity of the cross-validation procedure.<sup>14</sup>

401 a): Classification results for all subjects in all sites using a nested CV procedure

| PSC                      | AD            | $d$  | MCI           | $d$  | SCZ           | $d$  | DM            | $d$  | HTN           | $d$  | MDD           | $d$  | ASD           | $d$  |
|--------------------------|---------------|------|---------------|------|---------------|------|---------------|------|---------------|------|---------------|------|---------------|------|
| C32                      | 0.78±<br>0.02 | 1.52 | 0.62±<br>0.02 | 0.59 | 0.55±<br>0.02 | 0.30 | 0.56±<br>0.02 | 0.35 | 0.55±<br>0.02 | 0.28 | 0.52±<br>0.02 | 0.16 | 0.50±<br>0.02 | 0.07 |
| C64                      | 0.81±<br>0.02 | 1.73 | 0.63±<br>0.02 | 0.66 | 0.57±<br>0.02 | 0.41 | 0.57±<br>0.02 | 0.40 | 0.56±<br>0.02 | 0.31 | 0.53±<br>0.02 | 0.17 | 0.53±<br>0.02 | 0.19 |
| C128                     | 0.82±<br>0.02 | 1.82 | 0.65±<br>0.02 | 0.76 | 0.59±<br>0.02 | 0.47 | 0.56±<br>0.02 | 0.33 | 0.55±<br>0.02 | 0.30 | 0.52±<br>0.02 | 0.15 | 0.52±<br>0.02 | 0.15 |
| C256                     | 0.85±<br>0.02 | 2.08 | 0.66±<br>0.02 | 0.91 | 0.59±<br>0.02 | 0.50 | 0.56±<br>0.02 | 0.47 | 0.54±<br>0.02 | 0.31 | 0.51±<br>0.02 | 0.13 | 0.52±<br>0.02 | 0.16 |
| C512                     | 0.88±<br>0.02 | 2.34 | 0.67±<br>0.02 | 1.06 | 0.62±<br>0.02 | 0.62 | 0.57±<br>0.02 | 0.54 | 0.56±<br>0.02 | 0.42 | 0.52±<br>0.02 | 0.05 | 0.54±<br>0.02 | 0.24 |
| C1024                    | 0.90±<br>0.02 | 2.50 | 0.72±<br>0.02 | 1.12 | 0.65±<br>0.02 | 0.75 | 0.60±<br>0.02 | 0.59 | 0.59±<br>0.02 | 0.46 | 0.56±<br>0.02 | 0.13 | 0.55±<br>0.02 | 0.29 |
| Multi-scale <sup>a</sup> | 0.91±<br>0.02 | 2.54 | 0.72±<br>0.02 | 1.12 | 0.66±<br>0.02 | 0.77 | 0.61±<br>0.02 | 0.64 | 0.59±<br>0.02 | 0.47 | 0.55±<br>0.02 | 0.23 | 0.56±<br>0.02 | 0.30 |
| Multi-scale <sup>b</sup> | 0.92±<br>0.02 | 2.61 | 0.73±<br>0.02 | 1.13 | 0.67±<br>0.02 | 0.78 | 0.64±<br>0.02 | 0.67 | 0.61±<br>0.02 | 0.49 | 0.55±<br>0.02 | 0.26 | 0.58±<br>0.02 | 0.32 |
| AAL                      | 0.82±<br>0.02 | 1.81 | 0.66<br>±0.02 | 0.75 | 0.59±<br>0.02 | 0.46 | 0.57±<br>0.02 | 0.32 | 0.57±<br>0.02 | 0.35 | 0.52±<br>0.02 | 0.08 | 0.52±<br>0.02 | 0.14 |
| RAVENS                   | 0.85±<br>0.02 | 2.04 | 0.64<br>±0.02 | 0.74 | 0.60±<br>0.02 | 0.45 | 0.58±<br>0.02 | 0.33 | 0.55±<br>0.02 | 0.34 | 0.50±<br>0.02 | 0.05 | 0.54±<br>0.02 | 0.15 |

402 b): The classification results of the balanced accuracy (BA) from the test data in the nested CV  
 403 and the independently left-out site for the task of AD vs. CN were assessed using all available  
 404 multi-scale PSCs<sup>a</sup>. Three sites, namely ADNI, AIBL, and PENN, were considered for this  
 405 analysis. However, UKBB, BIOCARD, and BLSA data were excluded due to limited AD cases  
 406 (eTable 1). Similarly, data from OASIS were excluded due to discrepancies in the diagnosis  
 407 criteria for AD, as previously stated in our previous work<sup>7</sup>.

| Left-out site | Test BA in CV | Test BA in the left-out site |
|---------------|---------------|------------------------------|
| ADNI          | 0.90±0.02     | 0.88±0.02                    |
| AIBL          | 0.88±0.02     | 0.95±0.02                    |
| PENN          | 0.90±0.02     | 0.95±0.02                    |

409

410 **eTable 5:** 119 MUSE gray matter regions of interest.

411 L: Left hemisphere; R: Right hemisphere; ROI: region of interest.

| MUSE ROI                                  | MUSE ROI                                          | MUSE ROI                       |
|-------------------------------------------|---------------------------------------------------|--------------------------------|
| Precentral gyrus (R)                      | Occipital fusiform gyrus (R)                      | Anterior insula (L)            |
| Precentral gyrus (L)                      | Planum temporale (R)                              | Anterior orbital gyrus (R)     |
| Accumbens area (R)                        | Cerebellar vermal lobules I-V                     | Anterior orbital gyrus (L)     |
| Accumbens area (L)                        | Cerebellar vermal lobules VI-VII                  | Angular gyrus (R)              |
| Amygdala (R)                              | Cerebellar vermal lobules VIII-X                  | Angular gyrus (L)              |
| Amygdala (L)                              | Basal forebrain (R)                               | Calcarine cortex (R)           |
| Occipital pole (L)                        | Basal forebrain (L)                               | Calcarine cortex (L)           |
| Caudate (R)                               | Middle temporal gyrus (L)                         | Central operculum (R)          |
| Caudate (L)                               | Occipital pole (R)                                | Central operculum (L)          |
| Cerebellum exterior (R)                   | Planum temporale (L)                              | Cuneus (R)                     |
| Cerebellum exterior (L)                   | Parietal operculum (L)                            | Cuneus (L)                     |
| Planum polare (L)                         | Postcentral gyrus (R)                             | Entorhinal area (R)            |
| Middle temporal gyrus (R)                 | Postcentral gyrus (L)                             | Entorhinal area (L)            |
| Hippocampus (R)                           | Posterior orbital gyrus (R)                       | Frontal operculum (R)          |
| Hippocampus (L)                           | Temporal pole (R)                                 | Frontal operculum (L)          |
| Precentral gyrus medial segment (R)       | Temporal pole (L)                                 | Frontal pole (R)               |
| Precentral gyrus medial segment (L)       | Triangular part of the inferior frontal gyrus (R) | Frontal pole (L)               |
| Superior frontal gyrus medial segment (R) | Triangular part of the inferior frontal gyrus (L) | Fusiform gyrus (R)             |
| Superior frontal gyrus medial segment (L) | Transverse temporal gyrus (R)                     | Fusiform gyrus (L)             |
| Pallidum (R)                              | Superior frontal gyrus medial segment (L)         | Gyrus rectus (R)               |
| Pallidum (L)                              | Planum polare (R)                                 | Gyrus rectus (L)               |
| Putamen (R)                               | Transverse temporal gyrus (L)                     | Inferior occipital gyrus (R)   |
| Putamen (L)                               | Anterior cingulate gyrus (R)                      | Inferior occipital gyrus (L)   |
| Thalamus proper (R)                       | Anterior cingulate gyrus (L)                      | Inferior temporal gyrus (R)    |
| Thalamus proper (L)                       | Anterior insula (R)                               | Inferior temporal gyrus (L)    |
| Lingual gyrus (R)                         | Occipital fusiform gyrus (L)                      | Subcallosal area (R)           |
| Lingual gyrus (L)                         | Opercular part of inferior frontal gyrus (R)      | Subcallosal area (L)           |
| Lateral orbital gyrus (R)                 | Opercular part of inferior frontal gyrus (L)      | Superior frontal gyrus (R)     |
| Lateral orbital gyrus (L)                 | Orbital part of inferior frontal gyrus (R)        | Superior frontal gyrus (L)     |
| Middle cingulate gyrus (R)                | Orbital part of inferior frontal gyrus (L)        | Supplementary motor cortex (R) |
| Middle cingulate gyrus (L)                | Posterior cingulate gyrus (R)                     | Supplementary motor cortex (L) |
| Medial frontal cortex (R)                 | Posterior cingulate gyrus (L)                     | Supramarginal gyrus (R)        |
| Medial frontal cortex (L)                 | Precuneus (R)                                     | Supramarginal gyrus (L)        |
| Middle frontal gyrus (R)                  | Precuneus (L)                                     | Superior occipital gyrus (R)   |
| Middle frontal gyrus (L)                  | Parahippocampal gyrus (R)                         | Superior occipital gyrus (L)   |
| Middle occipital gyrus (R)                | Parahippocampal gyrus (L)                         | Superior parietal lobule (R)   |
| Middle occipital gyrus (L)                | Posterior insula (R)                              | Superior parietal lobule (L)   |
| Medial orbital gyrus (R)                  | Posterior insula (L)                              | Superior temporal gyrus (R)    |
| Medial orbital gyrus (L)                  | Parietal operculum (R)                            | Superior temporal gyrus (L)    |
| Superior frontal gyrus medial segment (R) | Posterior orbital gyrus (L)                       |                                |

412

413 **eAlgorithm 1:** Algorithm for sopNMF.  
 414 The source code of the Python implementation of sopNMF is available here:  
 415 <https://github.com/anbai106/SOPNMF>

---

**Algorithm 1:** sopNMF

---

- **Input:** maximum number of epochs  $e$ , number of component  $C$  or  $r$ , batch size  $b$ , early stopping criteria  $\theta$  (i.e., the loss without decreasing for a certain epochs) ;
- **Output:**  $\mathbf{W} \in \mathbb{R}^{d \times r}$ ,  $\mathbf{H} \in \mathbb{R}^{r \times n}$  ;
- **Initialization:**  $\mathbf{W}$  ;

```

if not  $\theta$  or epoch  $\neq e$  then
  for  $p \leftarrow 0$  to  $e$  do
    for  $i \leftarrow 0$  to  $t$  do
      Read mini-batch  $\mathbf{X}_{bi}$ 
      Update  $\mathbf{W}_{i+1}$  via Eq. 2
    end
     $loss = \sum_{i=1}^{\lfloor \frac{n}{b} \rfloor} \|\mathbf{X}_{bi} - \mathbf{W}\mathbf{W}^T \mathbf{X}_{bi}\|_F^2$  (Eq.3)
    if loss in  $\theta$  then
      Stop
    else
      Shuffle  $\mathbf{X}$ 
      Continue
    end
  end
else
  Stop
end

```

---

416  
 417  
 418

419 **References**

- 420
- 421 1. Shalev-Shwartz, S., Singer, Y. & Ng, A. Y. Online and batch learning of pseudo-metrics. in
- 422 *Proceedings of the twenty-first international conference on Machine learning* 94
- 423 (Association for Computing Machinery, 2004). doi:10.1145/1015330.1015376.
- 424 2. Kuhn, H. W. The Hungarian method for the assignment problem. *Naval Research Logistics*
- 425 *Quarterly* **2**, 83–97 (1955).
- 426 3. Pomponio, R. *et al.* Harmonization of large MRI datasets for the analysis of brain imaging
- 427 patterns throughout the lifespan. *Neuroimage* **208**, 116450 (2020).
- 428 4. Watanabe, K., Taskesen, E., van Bochoven, A. & Posthuma, D. Functional mapping and
- 429 annotation of genetic associations with FUMA. *Nat Commun* **8**, 1826 (2017).
- 430 5. Purcell, S. *et al.* PLINK: A Tool Set for Whole-Genome Association and Population-Based
- 431 Linkage Analyses. *Am J Hum Genet* **81**, 559–575 (2007).
- 432 6. Samper-González, J. *et al.* Reproducible evaluation of classification methods in
- 433 Alzheimer’s disease: Framework and application to MRI and PET data. *NeuroImage* **183**,
- 434 504–521 (2018).
- 435 7. Wen, J. *et al.* Convolutional neural networks for classification of Alzheimer’s disease:
- 436 Overview and reproducible evaluation. *Medical Image Analysis* **63**, 101694 (2020).
- 437 8. Wen, J. *et al.* Reproducible Evaluation of Diffusion MRI Features for Automatic
- 438 Classification of Patients with Alzheimer’s Disease. *Neuroinformatics* **19**, 57–78 (2021).
- 439 9. Stasinopoulos, D. M. & Rigby, R. A. Generalized Additive Models for Location Scale and
- 440 Shape (GAMLSS) in R. *Journal of Statistical Software* **23**, 1–46 (2008).

- 441 10. Wen, J. *et al.* Characterizing Heterogeneity in Neuroimaging, Cognition, Clinical  
442 Symptoms, and Genetics Among Patients With Late-Life Depression. *JAMA Psychiatry*  
443 (2022) doi:10.1001/jamapsychiatry.2022.0020.
- 444 11. Zhao, B. *et al.* Genome-wide association analysis of 19,629 individuals identifies variants  
445 influencing regional brain volumes and refines their genetic co-architecture with cognitive  
446 and mental health traits. *Nat Genet* **51**, 1637–1644 (2019).
- 447 12. Klein, A. & Tourville, J. 101 Labeled Brain Images and a Consistent Human Cortical  
448 Labeling Protocol. *Frontiers in Neuroscience* **6**, 171 (2012).
- 449 13. Elliott, L. T. *et al.* Genome-wide association studies of brain imaging phenotypes in UK  
450 Biobank. *Nature* **562**, 210–216 (2018).
- 451 14. Nadeau, C. & Bengio, Y. Inference for the Generalization Error. in *Advances in Neural*  
452 *Information Processing Systems 12* (eds. Solla, S. A., Leen, T. K. & Müller, K.) 307–313  
453 (MIT Press, 2000).
- 454
